# Supplementary material
Source: Springer Nature journal article supplement (https://www.springermedizin.de/resource/supplementary/13054_2013_2978_MOESM2_ESM.pdf/9712288)

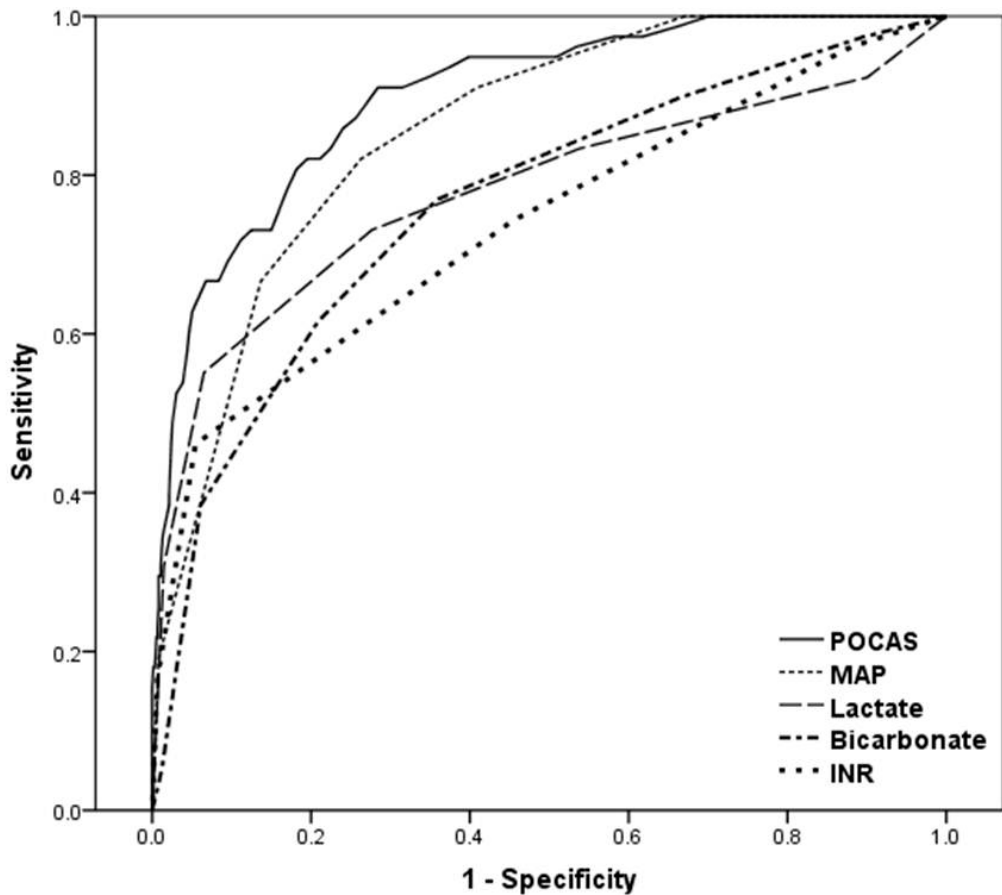

|                    | <b>AUC</b> | <b>SE</b> | <b>P value</b> | <b>95% CI</b> |
|--------------------|------------|-----------|----------------|---------------|
| <b>POCAS</b>       | 0.899      | 0.018     | 0.0001         | 0.864-0.934   |
| <b>MAP</b>         | 0.856      | 0.020     | 0.0001         | 0.817-0.894   |
| <b>Lactate</b>     | 0.778      | 0.035     | 0.0001         | 0.710-0.846   |
| <b>Bicarbonate</b> | 0.762      | 0.030     | 0.0001         | 0.702-0.821   |
| <b>INR</b>         | 0.737      | 0.034     | 0.0001         | 0.670-0.804   |

Supplement: MOESM2 [file 9712288]
